# Supplementary material for: Change in cognition and body mass index in relation to preclinical dementia
Source: PubMed Central journal article supplement — Alzheimers Dement (N Y). 2021 May 13;7(1):e12176. doi: 10.1002/trc2.12176 (PMC8118197; doi:10.1002/trc2.12176), 2021-05-13
Supplement: TRC2-7-e12176-s002.pdf [file TRC2-7-e12176-s002.pdf]

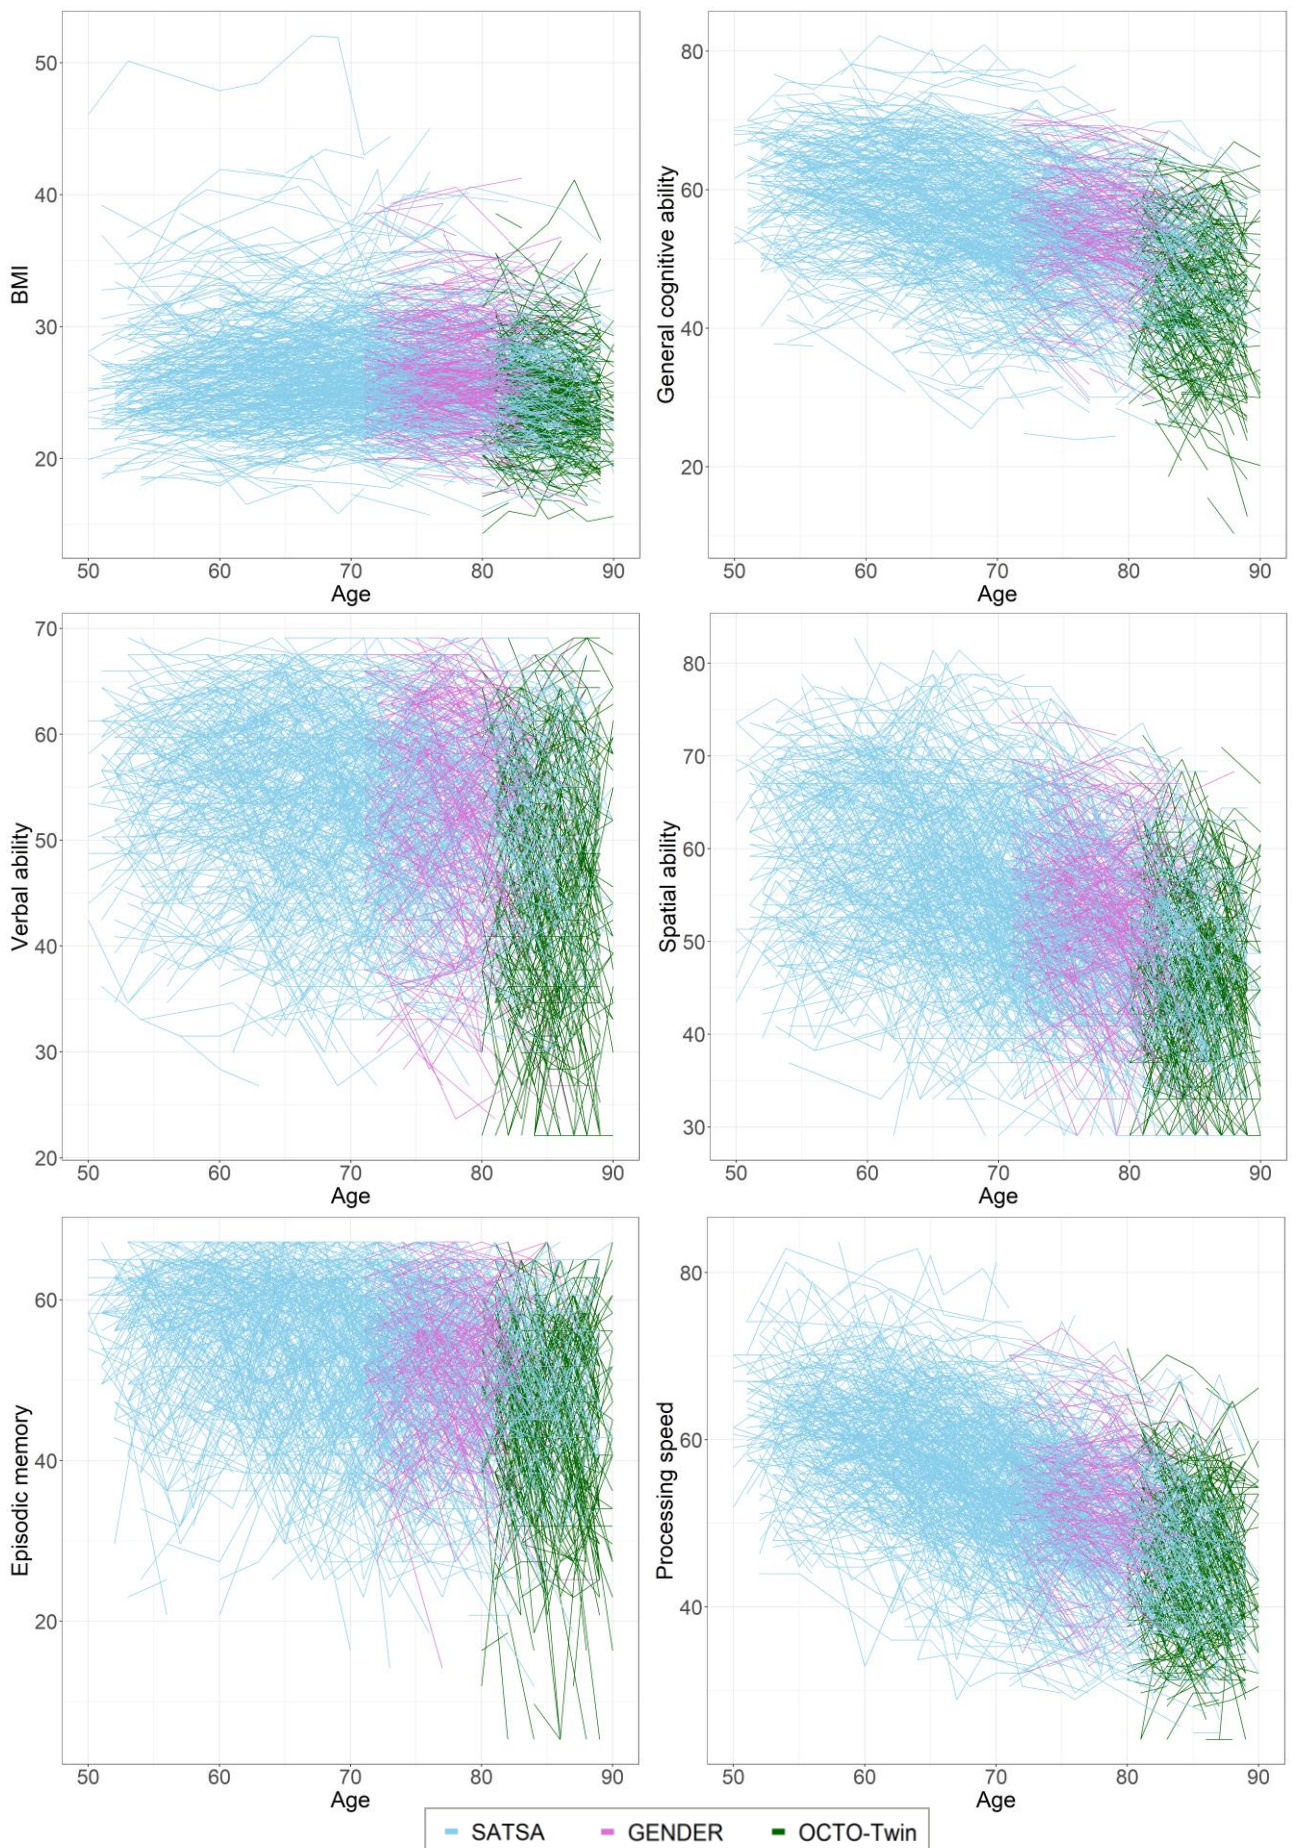

**Figure A.1: Individual trajectories of body mass index and cognitive abilities from age 50-89, by study.** Individual values are plotted across age, with SATSA participant represented in blue, GENDER participants in purple, and OCTO-Twin participants in green.
